# Supplementary material for: Design strategy for arranging an aromatic cyclic trimer into a tripodal molecule
Source: Royal Society of Chemistry journal article supplement (doi:10.1039/c2ra22679k), 2012-12-11
Supplement: c2ra22679k.pdf [file c2ra22679k.pdf]

## Supporting Information

### **Design strategy for arranging aromatic cyclic trimer in molecule**

Palani Elumalai, Palanisamy Rajakannu, Firasat Hussain and Malaichamy Sathiyendiran\*

*Department of Chemistry, University of Delhi, Delhi 110 007, India.*

#### Contents

##### **Experimental Section**

- Table S1** Crystallographic data for **1**·CH<sub>3</sub>OH
- Fig. S1** Two adjacent molecules of **1** showing the  $\pi \cdots \pi$  and C–H $\cdots\pi$  interactions.
- Fig. S2** Three adjacent molecules of **1** showing the anticofacial arrangement of two thiophene benzimidazolyl units. The methyl groups attached to the central aromatic ring are not shown for clarity.
- Fig. S3** Hydrogen bonding interaction between **1** and lattice methanol molecule.
- Fig. S4** The <sup>1</sup>H NMR spectra of benzimidazole and **L**<sup>1</sup> in *d*<sub>6</sub>-DMSO.
- Fig. S5** The <sup>1</sup>H NMR spectra of 2-(methylthio)benzimidazole and **L**<sup>2</sup> in *d*<sub>6</sub>-DMSO.
- Fig. S6** The <sup>1</sup>H NMR spectra of imidazole and **L**<sup>3</sup> in *d*<sub>6</sub>-DMSO.

## General experimental methods.

All starting materials and products were found to be stable in moisture and air. Starting materials such as 2-thiophenecarboxaldehyde, furan-2-carboxaldehyde, mesitylene, *o*-phenylenediamine and dimethylformamide were purchased from commercial sources and used as received. The ligands 2-thiophene-2-benzimidazole, 2-furan-2-benzimidazole and 1,3,5-tri(bromomethyl)-2,4,6-trimethylbenzene can be easily prepared, by a similar procedure to that reported earlier.<sup>S1,S2</sup> Elemental analyses were performed on a ElementarAnalysensysteme GmbH Vario EL-III instrument. <sup>1</sup>H and <sup>13</sup>C NMR spectra were recorded on an JEOL ECX 400 NMR spectrometer operating at 400 and 100.5 MHz, respectively. The chemical shifts are reported in parts per million (ppm) relative to residual solvent signal. Melting points for compounds were recorded in BUCHI laboratory equipment-Melting point M-560.

**Synthesis of 1,3,5-tris(2-thiophenebenzimidazol-1-ylmethyl)-2,4,6-trimethylbenzene (1).** A mixture of 2-thiophene-2-benzimidazole (889 mg, 4.44 mmol) and KOH (501 mg, 8.93 mmol) was stirred in dimethylformamide (10 mL) at room temperature for 1 h. The 1,3,5-tri(bromomethyl)-2,4,6-trimethylbenzene (592 mg, 1.48 mmol) was added to the reaction mixture and continuously allowed to stir for 72 h. The reaction was quenched by adding 200 mL of water. The white powders was collected by filtration and dissolved in hot methanol. Colourless crystals **1** were obtained at room temperature after few days. Yield: 90 % (1051 mg, 1.33 mmol). Mp. : 275 °C (dec.). Anal. Calcd. for C<sub>45</sub>H<sub>36</sub>N<sub>6</sub>S<sub>3</sub>·CH<sub>3</sub>OH (M.wt. 789.04): C, 70.02; H, 5.11; N, 10.65; S, 12.19%. Found: C, 69.80; H, 5.28; N, 10.74; S, 12.37. <sup>1</sup>H NMR (400 MHz, DMSO-*d*<sub>6</sub>): δ 7.84–7.83 (m, 6 H, H<sup>4,5</sup>, thiophene), 7.59 (d, 3 H, *J*<sub>HH</sub> = 8.24 Hz, H<sup>4</sup>, benzimidazolyl), 7.27 (t, 3 H, *J*<sub>HH</sub> = 4.36 Hz, H<sup>3</sup>, thiophene), 7.12 (t, 3 H, *J*<sub>HH</sub> = 7.8 Hz, H<sup>5</sup>, benzimidazolyl), 6.64 (t, 3 H, *J*<sub>HH</sub> = 7.8 Hz, H<sup>6</sup>, benzimidazolyl), 6.29 (d, 3 H, *J*<sub>HH</sub> = 8.28 Hz, H<sup>7</sup>, benzimidazolyl), 5.74 (s, 6 H, methylene), and 1.99 (s, 9 H, H<sup>9</sup>, –CH<sub>3</sub>).

**Synthesis of 1,3,5-tris(2-furanbenzimidazol-1-ylmethyl)-2,4,6-trimethylbenzene (2).** A mixture of 2-furan-2-benzimidazole (807 mg, 4.38 mmol) and KOH (512 mg, 9.12 mmol) was stirred in dimethylformamide (10 mL) at room temperature for 1 h. The 1,3,5-tri(bromomethyl)-2,4,6-trimethylbenzene (591 mg, 1.48 mmol) was added to the reaction mixture and continuously allowed to stir for 72 h. Workup procedure was followed as **1**. Pale brown needle type crystals of **2** were obtained by crystallization from hot methanol after few

days at room temperature. Yield: 74 % (796 mg, 1.10 mmol). Mp: 278 °C (dec.). Anal. Calcd for  $C_{45}H_{36}N_6O_3 \cdot H_2O$  (M.wt. 726.82): C, 74.36; H, 5.27; N, 11.56%. Found: C, 74.09; H, 5.43; N, 11.48.  $^1H$  NMR (400 MHz, DMSO- $d_6$ ):  $\delta$  7.97 (d, 3 H,  $J_{HH} = 1.48$  Hz, H<sup>5</sup>, furan), 7.59 (d, 3 H,  $J_{HH} = 8.08$  Hz, H<sup>4</sup>, benzimidazolyl), 7.28 (d, 3 H,  $J_{HH} = 3.64$  Hz, H<sup>3</sup>, furan), 7.13 (t, 3 H,  $J_{HH} = 7.68$  Hz, H<sup>5</sup>, benzimidazolyl), 6.76-6.75 (m, 3 H, H<sup>4</sup>, furan), 6.64 (t, 3 H,  $J_{HH} = 7.7$  Hz, H<sup>6</sup>, benzimidazolyl), 6.35 (d, 3 H,  $J_{HH} = 8.04$  Hz, H<sup>7</sup>, benzimidazolyl), 5.83 (s, 6 H, methylene), and 2.09 (s, 9 H, H<sup>9</sup>,  $-CH_3$ ).  $^{13}C$  NMR (100.5 MHz, DMSO- $d_6$ ):  $\delta$  145.17 (CH<sup>5</sup>, furan), 144.71 (C), 144.43 (C), 142.84 (C), 138.27 (C), 134.61 (C), 131.30 (C), 122.70 (CH<sup>6</sup>, benzimidazolyl), 121.92 (CH<sup>5</sup>, benzimidazolyl), 119.30 (CH<sup>4</sup>, benzimidazolyl), 113.71 (CH<sup>3</sup>, furan), 112.10 (CH<sup>4</sup>, furan), 111.17 (CH<sup>7</sup>, benzimidazolyl), 45.60 (CH<sub>2</sub>) and 16.35 (CH<sub>3</sub>).

**X-ray Crystallography.** Intensity data of suitably sized crystal of **1** was collected on an Oxford Xcalibur S diffractometer (4-circle  $\kappa$  goniometer, Sapphire-3 CCD detector,  $\omega$  scans, graphite monochromator, and a single wavelength Enhance X-ray source with MoK $\alpha$  radiation).<sup>S3</sup> Pre-experiment, data collection, data reduction and absorption corrections were performed with the CrysAlisPro software suite.<sup>S4</sup> The structures were solved by direct methods using SIR 92,<sup>S5</sup> which revealed the atomic positions, and refined using the SHELX-97 program package<sup>S6</sup> and SHELXL97 (within the WinGX program package).<sup>S7,S8</sup> Non-hydrogen atoms were refined anisotropically. C–H hydrogen atoms were placed in geometrically calculated positions by using a riding model.

## Reference

- S1 X. Han, H. Ma and Y. Wang, *Rus. J. Org. Chem.* 2008, **44**, 863.  
S2 A. W. van der Made and R. H. van der Made, *J. Org. Chem.* 1993, **58**, 1262.  
S3 *ENHANCE, Oxford Xcalibur Single Crystal Diffractometer*, version 1.171.34.40; Oxford Diffraction Ltd: Oxford, U.K., 2006.  
S4 *CrysAlisPro*, version 1.171.34.40; Oxford Diffraction Ltd: Oxford, U.K., 2006.  
S5 A. Altomare, G. Cascarano, C. Giacovazzo, A. Guagliardi, M. C. Burla, G. Polidori and M. Camalli, *J. Appl. Crystallogr.* 1994, **27**, 435.  
S6 G. M. Sheldrick, *SHELXL-97, Program for crystal structure refinement*; University of Göttingen: Göttingen, Germany, 1997.  
S7 G. M. Sheldrick, *Acta Crystallogr.* 2008, **A64**, 112.  
S8 L. J. Farrugia, *J. Appl. Crystallogr.* 1999, **32**, 837.

**Table S1.** The crystallographic data of **1**.

|                                                                 | <b>1</b>                                                       |
|-----------------------------------------------------------------|----------------------------------------------------------------|
| formula                                                         | C <sub>46</sub> H <sub>40</sub> N <sub>6</sub> OS <sub>3</sub> |
| <i>M</i> <sub>r</sub>                                           | 789.02                                                         |
| crystal system                                                  | orthorhombic                                                   |
| space group                                                     | <i>Pbca</i>                                                    |
| <i>a</i> (Å)                                                    | 24.0070(17)                                                    |
| <i>b</i> (Å)                                                    | 13.3108(7)                                                     |
| <i>c</i> (Å)                                                    | 24.2954(14)                                                    |
| <i>β</i> (deg)                                                  | 90.00                                                          |
| <i>V</i> (Å <sup>3</sup> )                                      | 7763.7(8)                                                      |
| <i>Z</i>                                                        | 8                                                              |
| <i>T</i> (K)                                                    | 293 (2)                                                        |
| <i>λ</i> (Å)                                                    | 0.71073                                                        |
| <i>D</i> <sub>calc</sub> (g cm <sup>-3</sup> )                  | 1.350                                                          |
| <i>μ</i> (Mo Kα) (mm <sup>-1</sup> )                            | 0.237                                                          |
| no. of reflns collected                                         | 33730                                                          |
| no. of reflns used                                              | 6812                                                           |
| <i>R</i> <sub>1</sub> [ <i>I</i> > 2σ( <i>I</i> )] <sup>a</sup> | 0.0909                                                         |
| w <i>R</i> <sub>2</sub> (all data) <sup>b</sup>                 | 0.1479                                                         |
| Goof <sup>c</sup>                                               | 1.133                                                          |
| largest diff peak/hole (e Å <sup>-3</sup> )                     | 0.23/−0.30                                                     |

<sup>a</sup> $R_1 = \sum ||F_o| - |F_c|| / \sum |F_o|$ ; <sup>b</sup> $wR_2 = \{\sum [w(F_o^2 - F_c^2)^2] / \sum [w(F_o^2)^2]\}^{1/2}$ ;

<sup>c</sup> $S = \{\sum [w(F_o^2 - F_c^2)^2] / (n-p)\}^{1/2}$

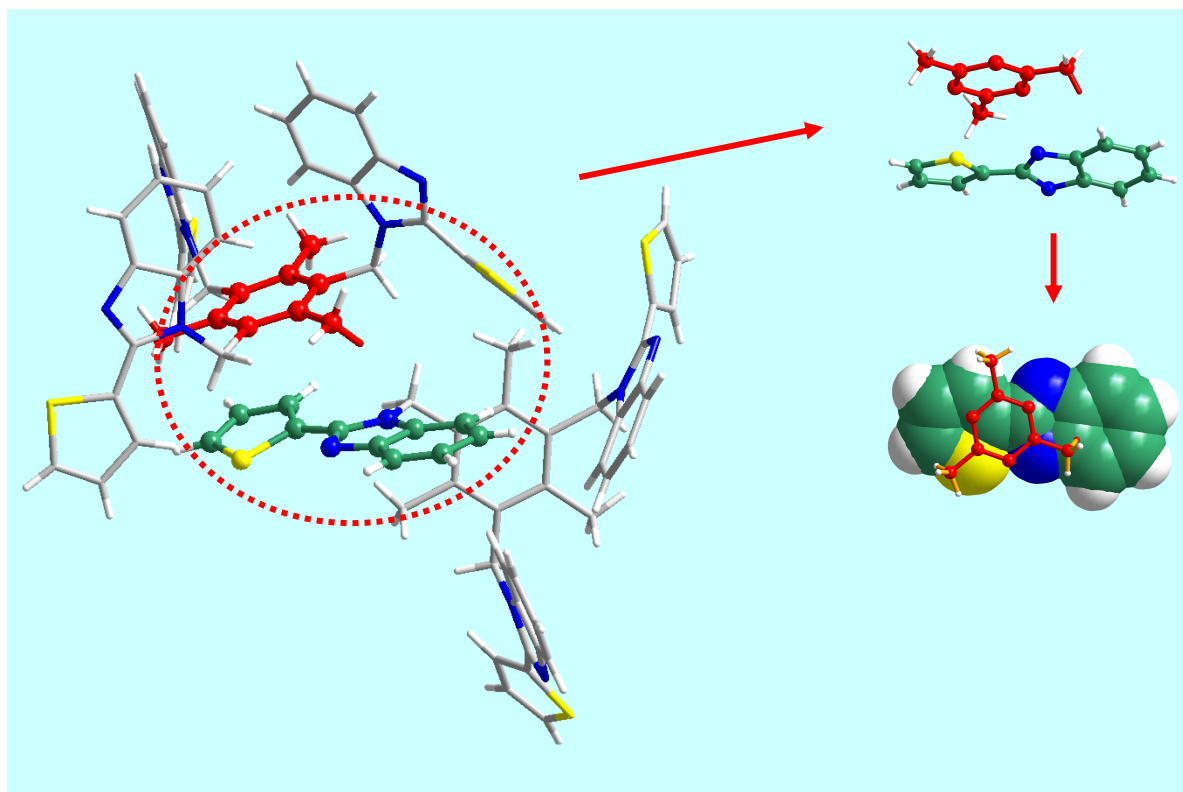

**Fig. S1** Two adjacent molecules of **1** showing the  $\pi \cdots \pi$  and C-H $\cdots\pi$  interactions.

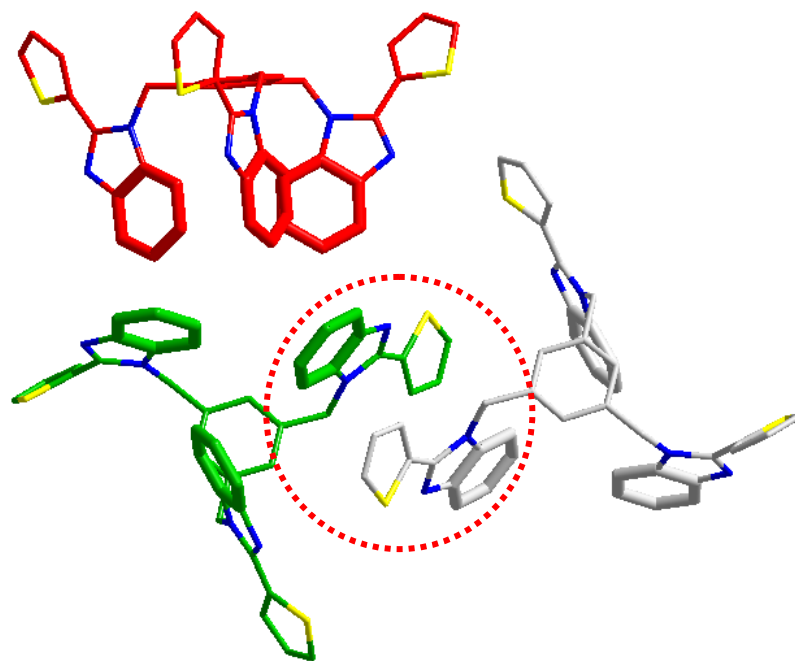

**Fig. S2** Three adjacent molecules of **1** showing the *anti*-cofacial arrangement of two thiophene benzimidazolyl units. The methyl groups attached to the central aromatic ring are not shown for clarity.

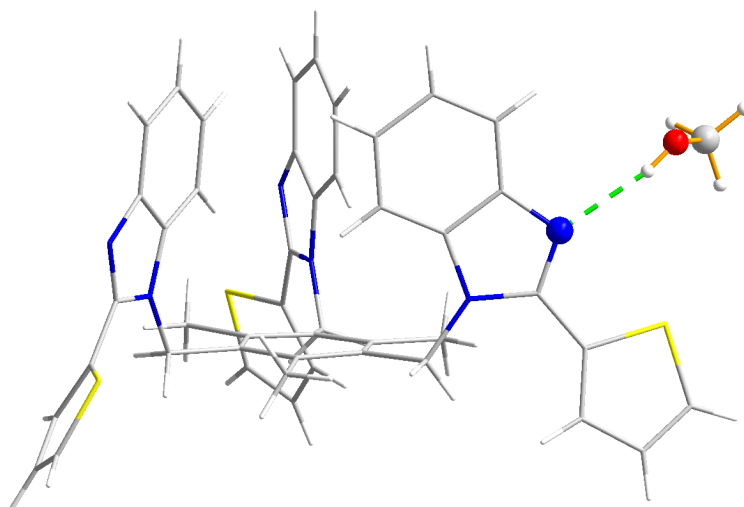

**Fig. S3** Hydrogen bonding interaction between **1** and lattice methanol molecule.

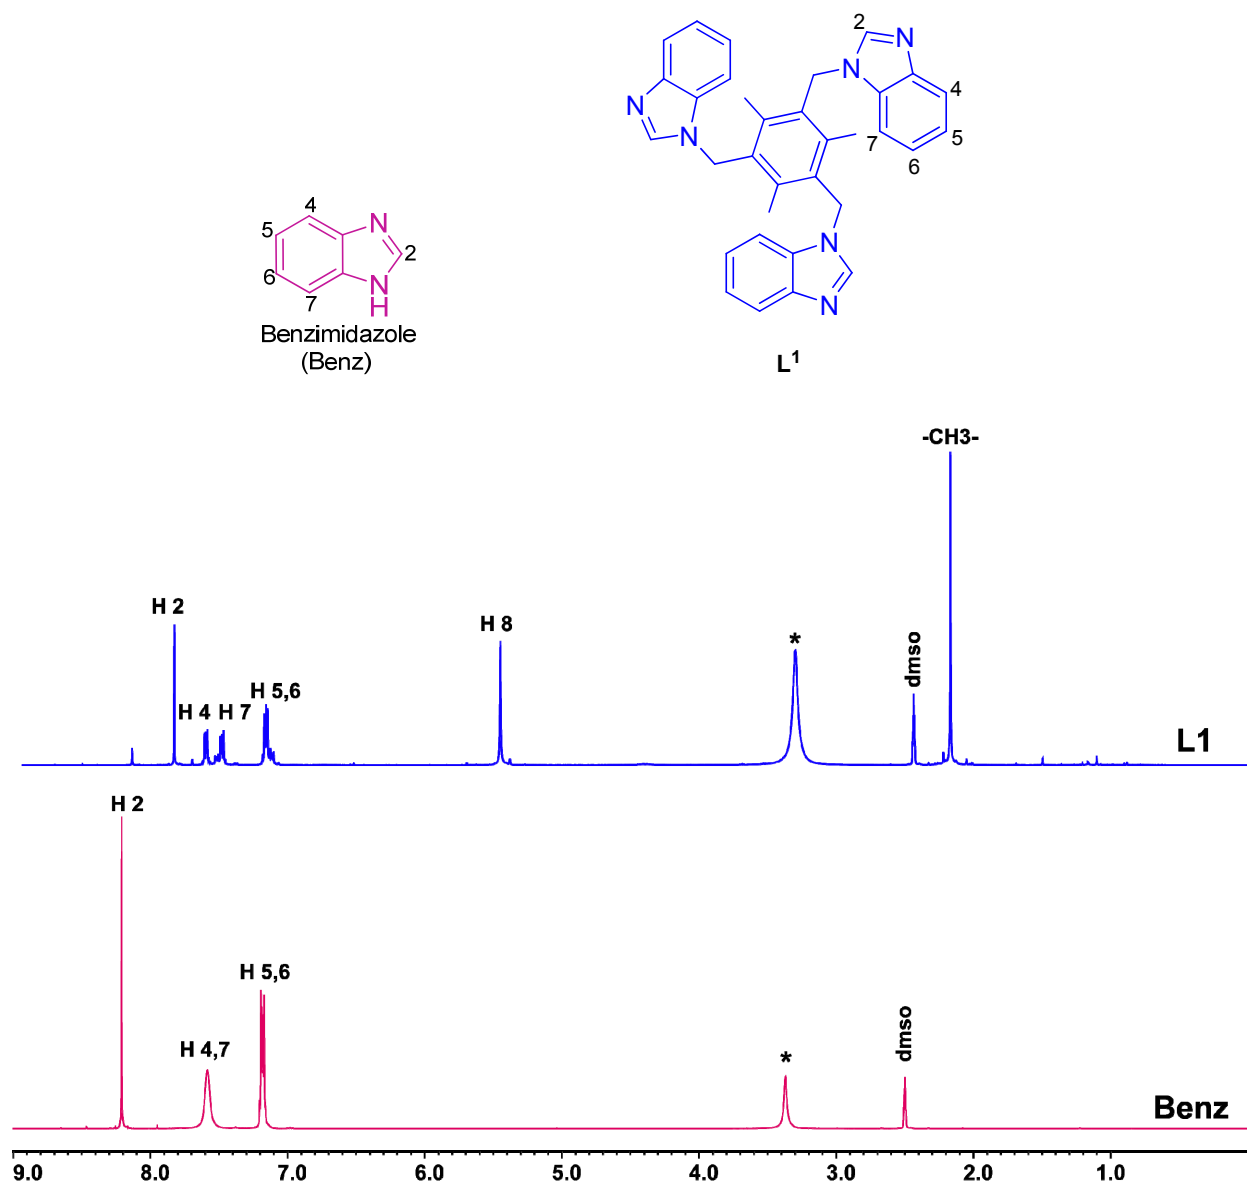

**Fig. S4** The <sup>1</sup>H NMR spectra of benzimidazole and L<sup>1</sup> in *d*<sub>6</sub>-DMSO.



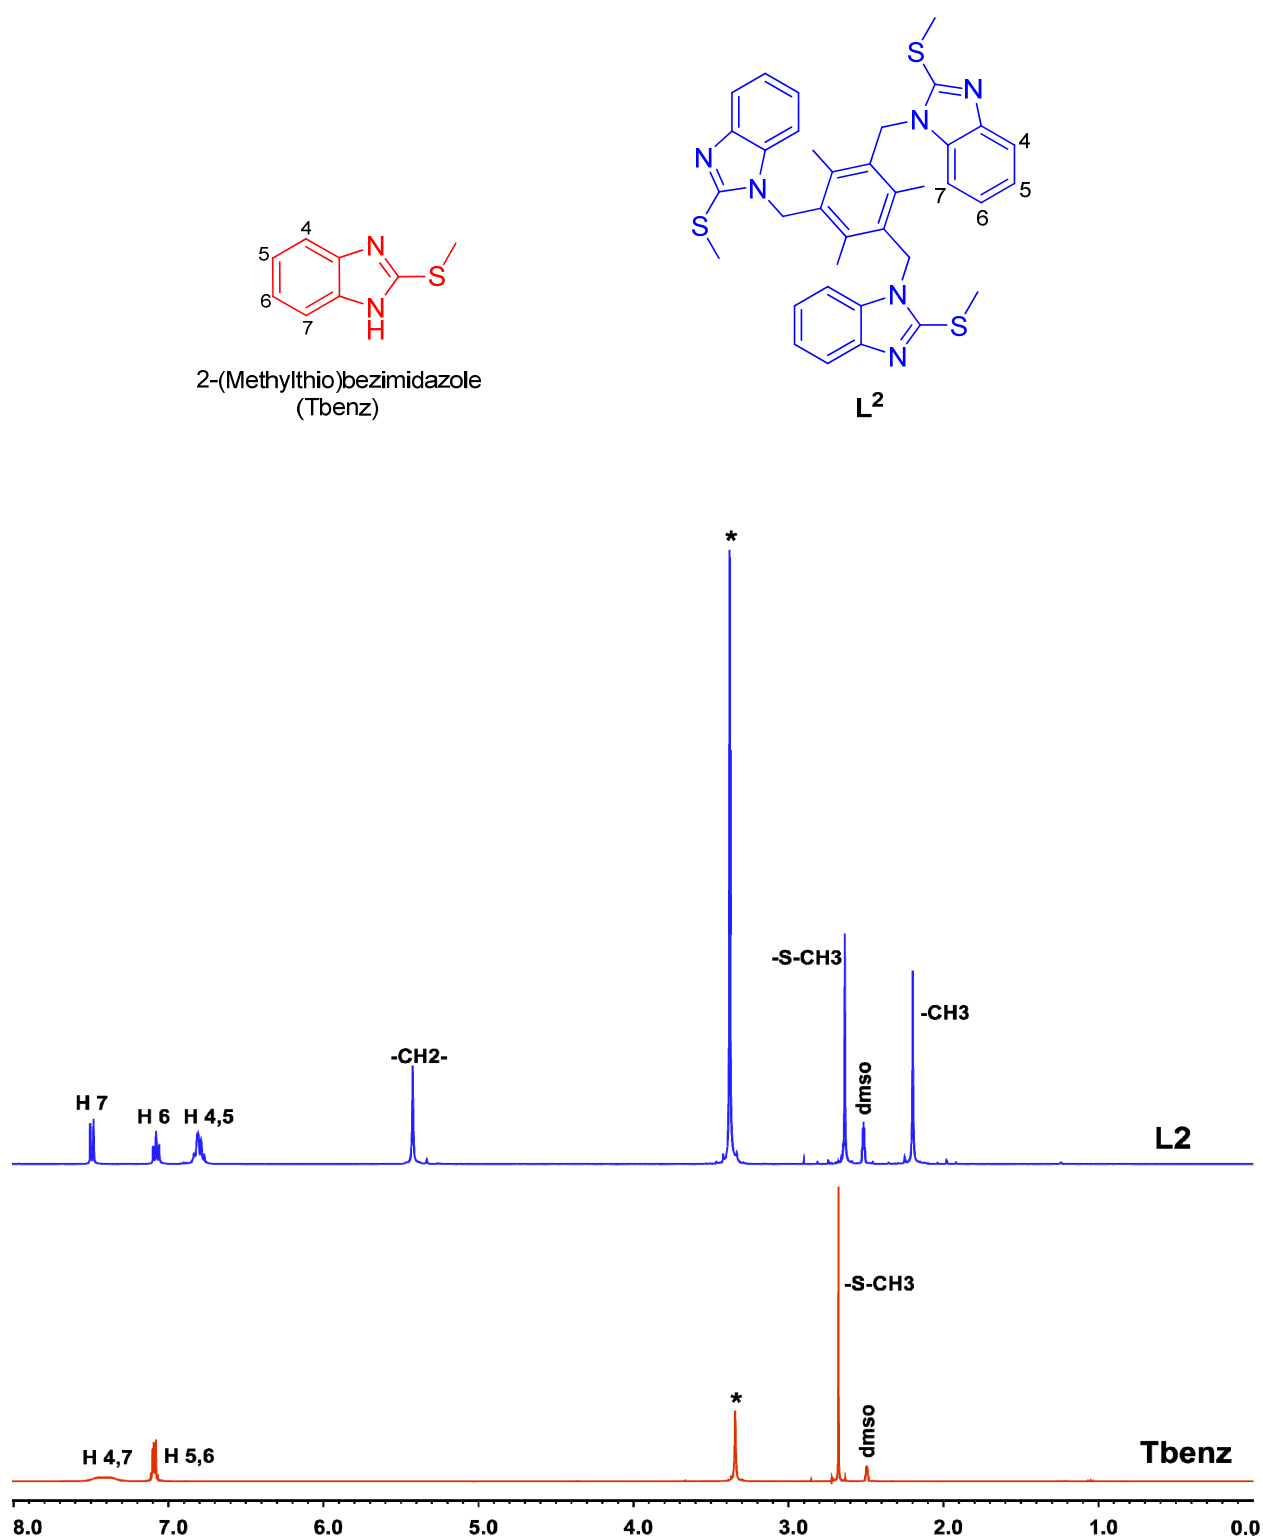

**Fig. S5** The <sup>1</sup>H NMR spectra of 2-(methylthio)benzimidazole and L<sup>2</sup> in d<sub>6</sub>-DMSO.

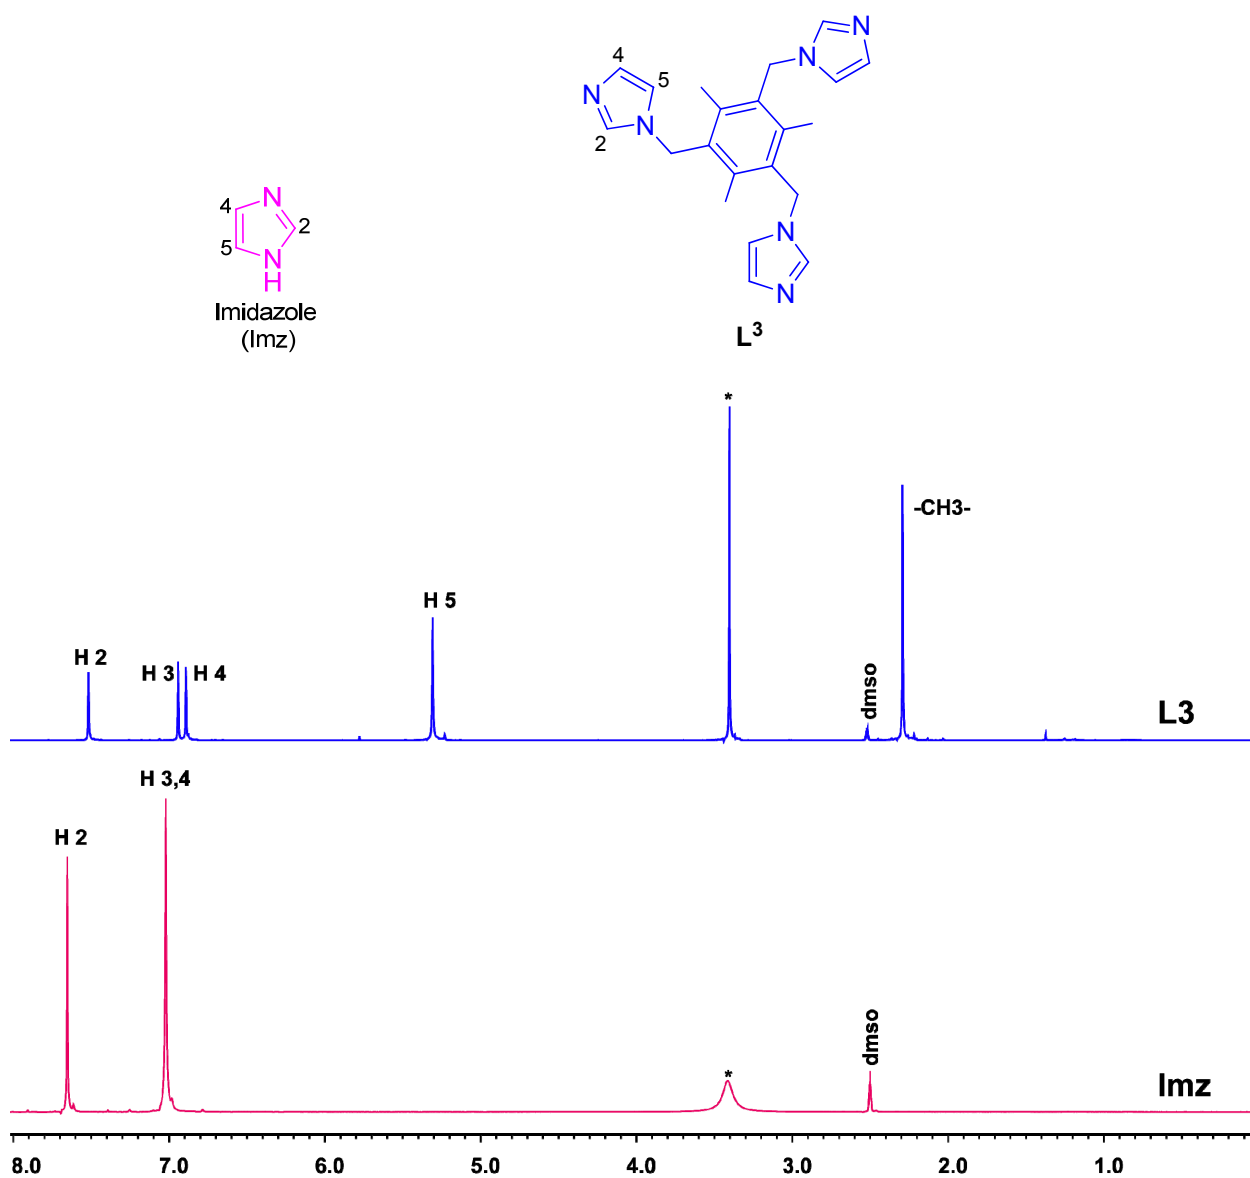

**Fig. S6** The <sup>1</sup>H NMR spectra of imidazole and L<sup>3</sup> in *d*<sub>6</sub>-DMSO.
